# Supplementary material for: Epigenetic Induction of Definitive and Pancreatic Endoderm Cell Fate in Human Fibroblasts
Source: Hindawi journal article supplement (doi:10.1155/2016/7654321), 2016-01-01
Supplement: f1 [file 7654321.f1.pdf]

## **Supplementary Figures and Tables**

### **Epigenetic induction of definitive and pancreatic endoderm cell fate in human fibroblasts**

#### **Table of contents**

Supplementary figure 1. Trichostatin-A (TSA) treatment of BJ foreskin fibroblast induces transient definitive endoderm and pancreatic endoderm markers.....**2**

Supplementary figure 2. 5-azacytidine (5AZA) and Trichostatin-A (TSA) treatment of BJ foreskin fibroblast induces transient definitive endoderm and pancreatic endoderm markers.....**3**

Supplementary figure 3. Comparison of gene expression changes in primary adult fibroblasts treated with TSA-CRM vs. 5AZA-TSA-CRM.....**4**

Supplementary figure 4. Comparison of gene expression changes in BJ1 foreskin fibroblasts treated with TSA-CRM vs. 5AZA-TSA-CRM.....**5**

Supplementary figure 5. 5-azacytidine (5AZA) treatment of primary adult fibroblasts does not induce marker expression.....**6**

Supplementary figure 6. 5-azacytidine (5AZA) treatment of BJ foreskin adult fibroblast does not induces marker expression.....**7**

#### **Supplementary table-1**

Primers sets used for gene expression analysis by qRT-PCR.....**8**

#### **Supplementary table-2**

Primers sets used for gene expression analysis by qRT-PCR.....**9**

Supplementary figure-1

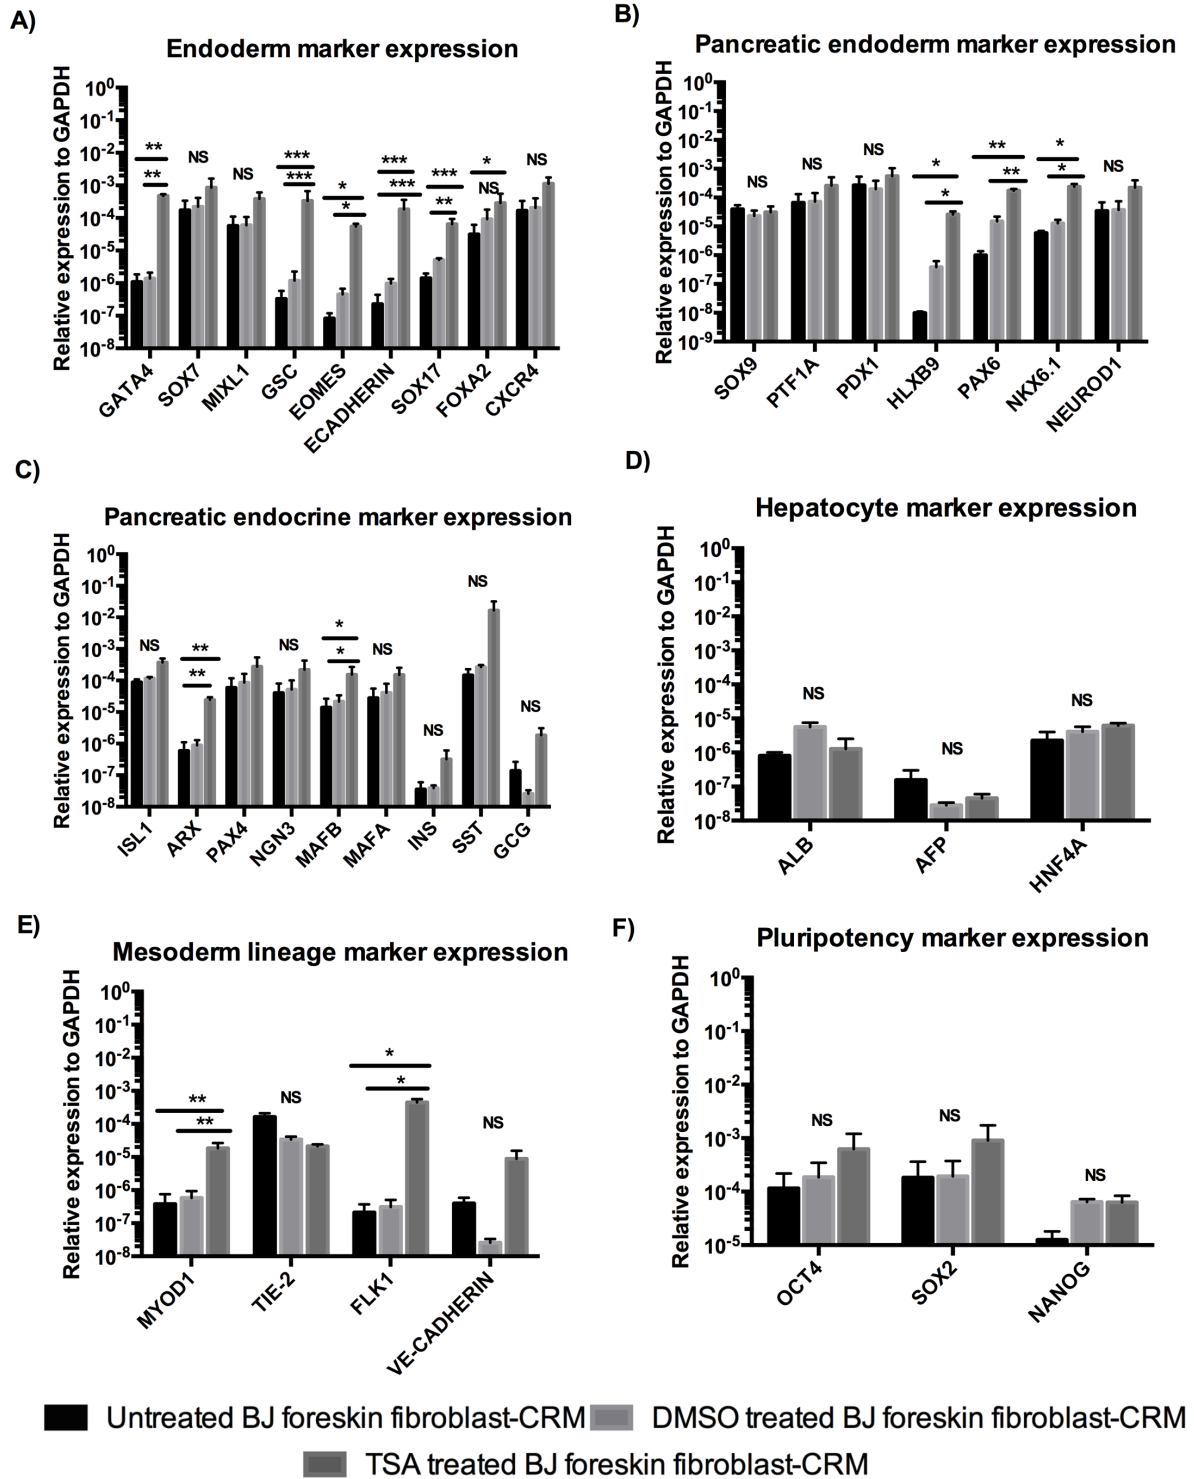

Supplementary figure-2

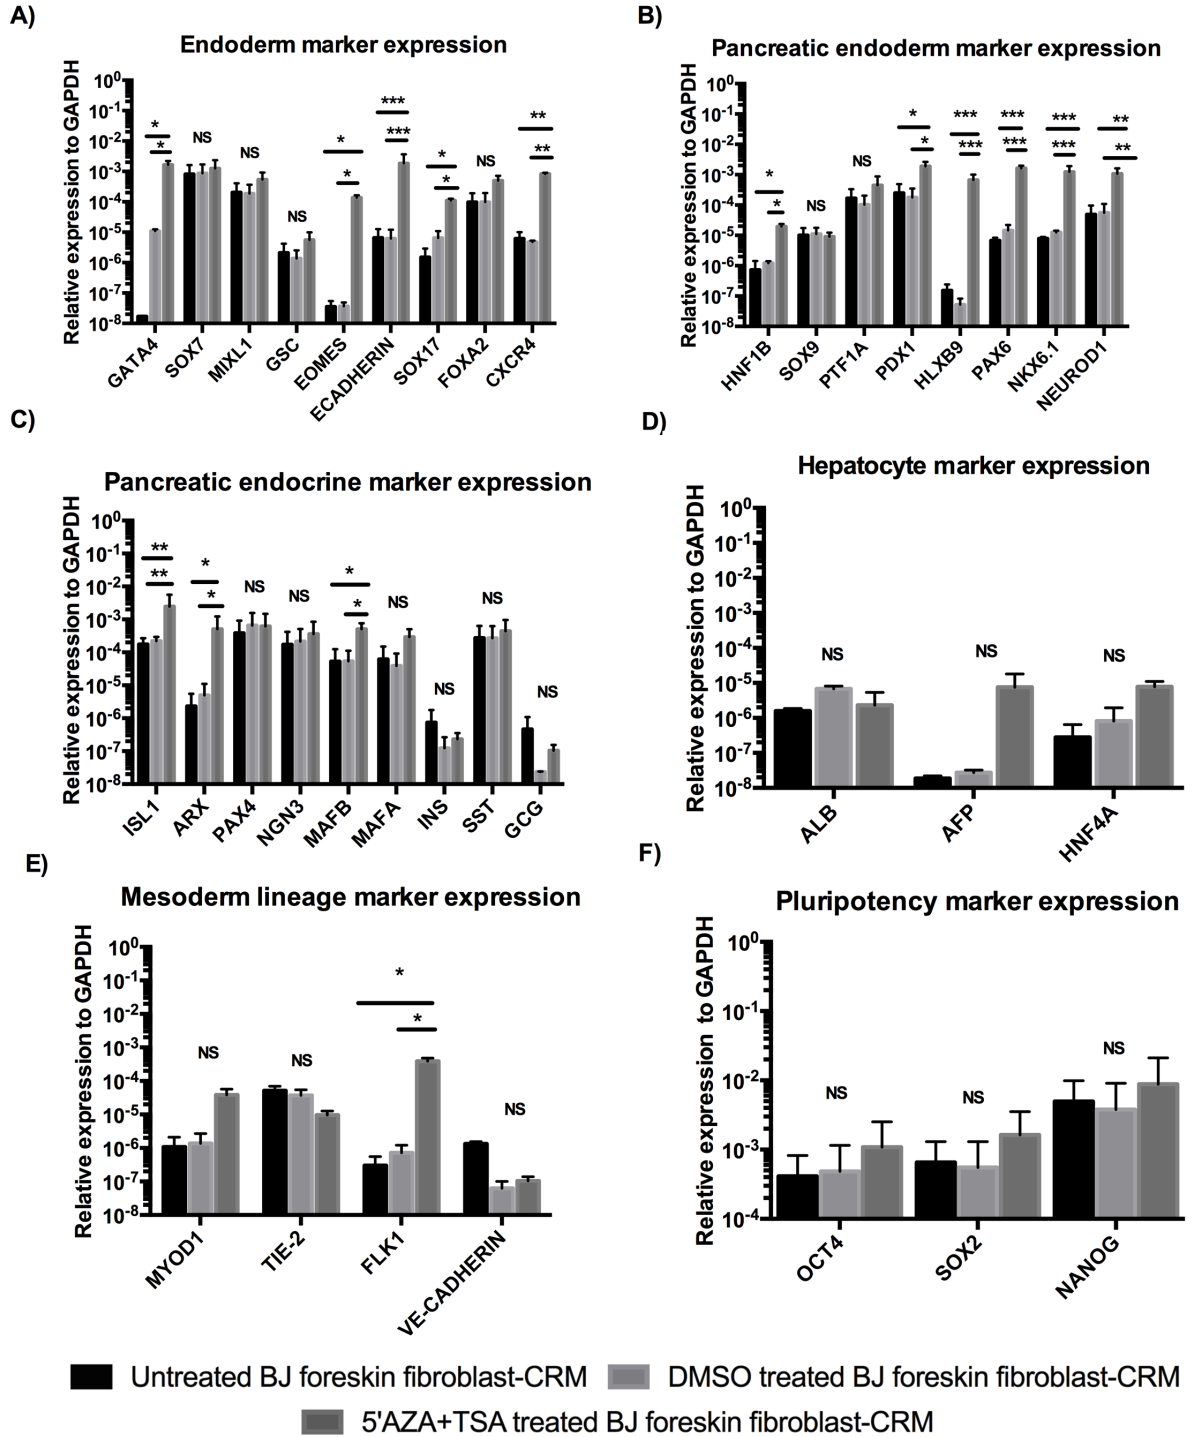

Supplementary figure-3

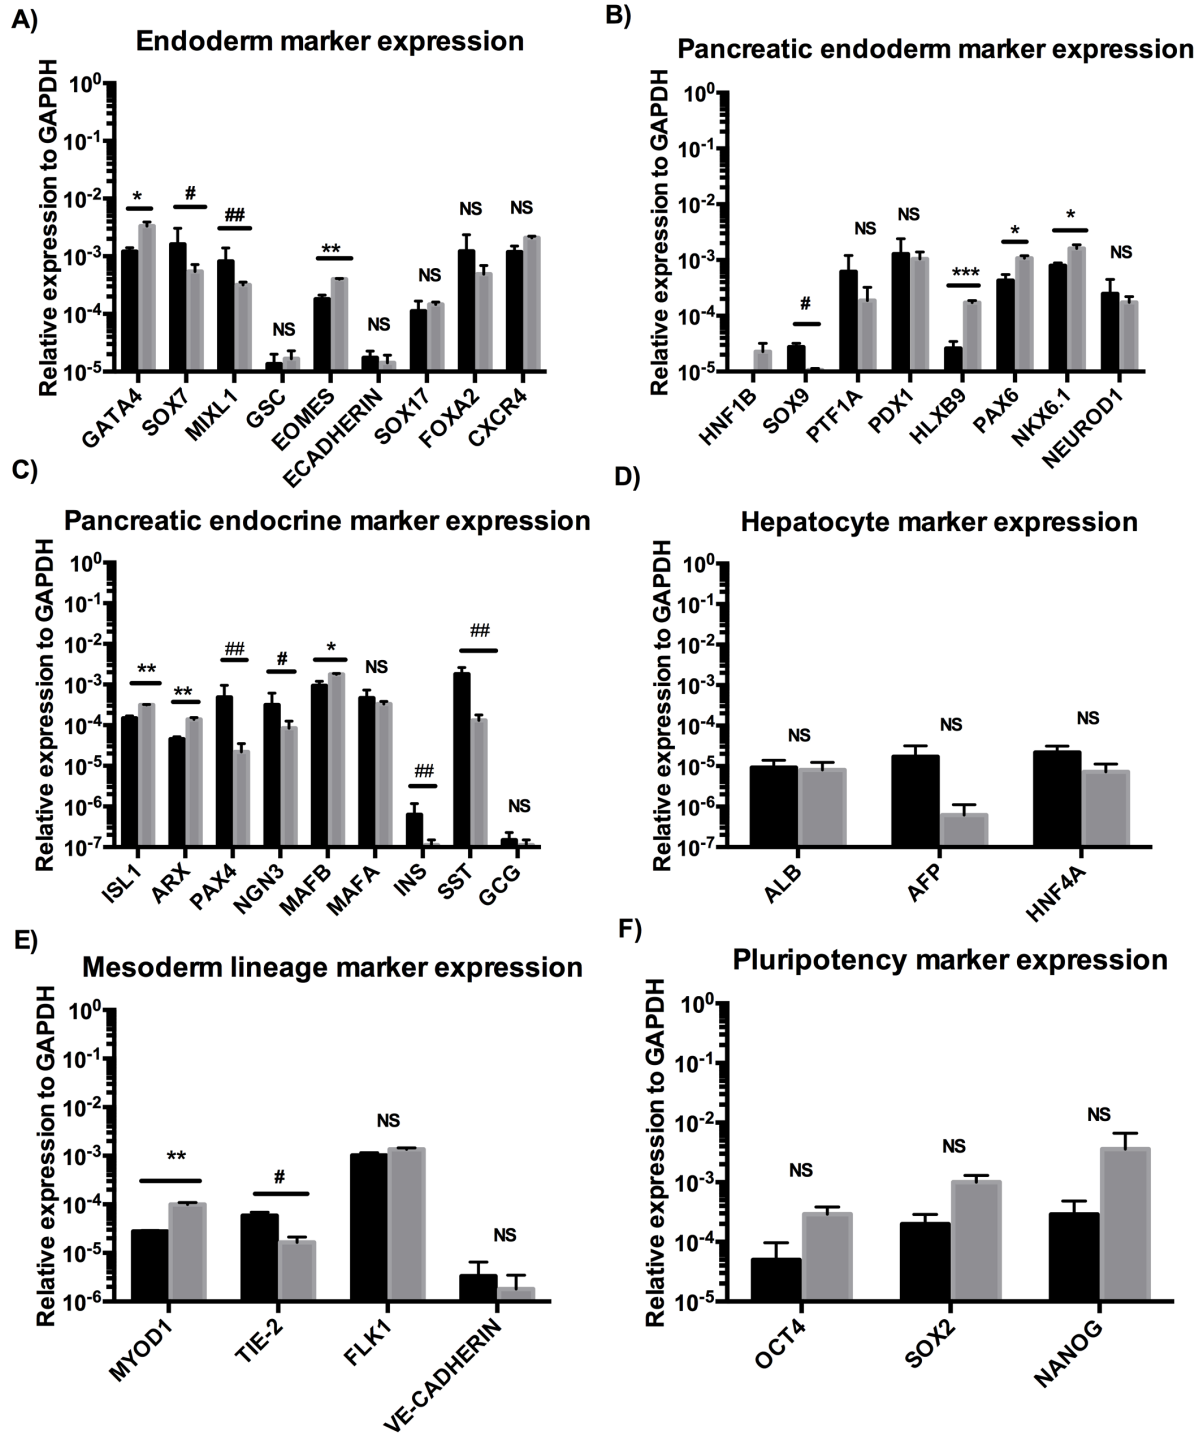

■ TSA treated primary human fibroblast-CRM    ■ 5'AZA+TSA treated primary human fibroblast-CRM

Supplementary figure-4

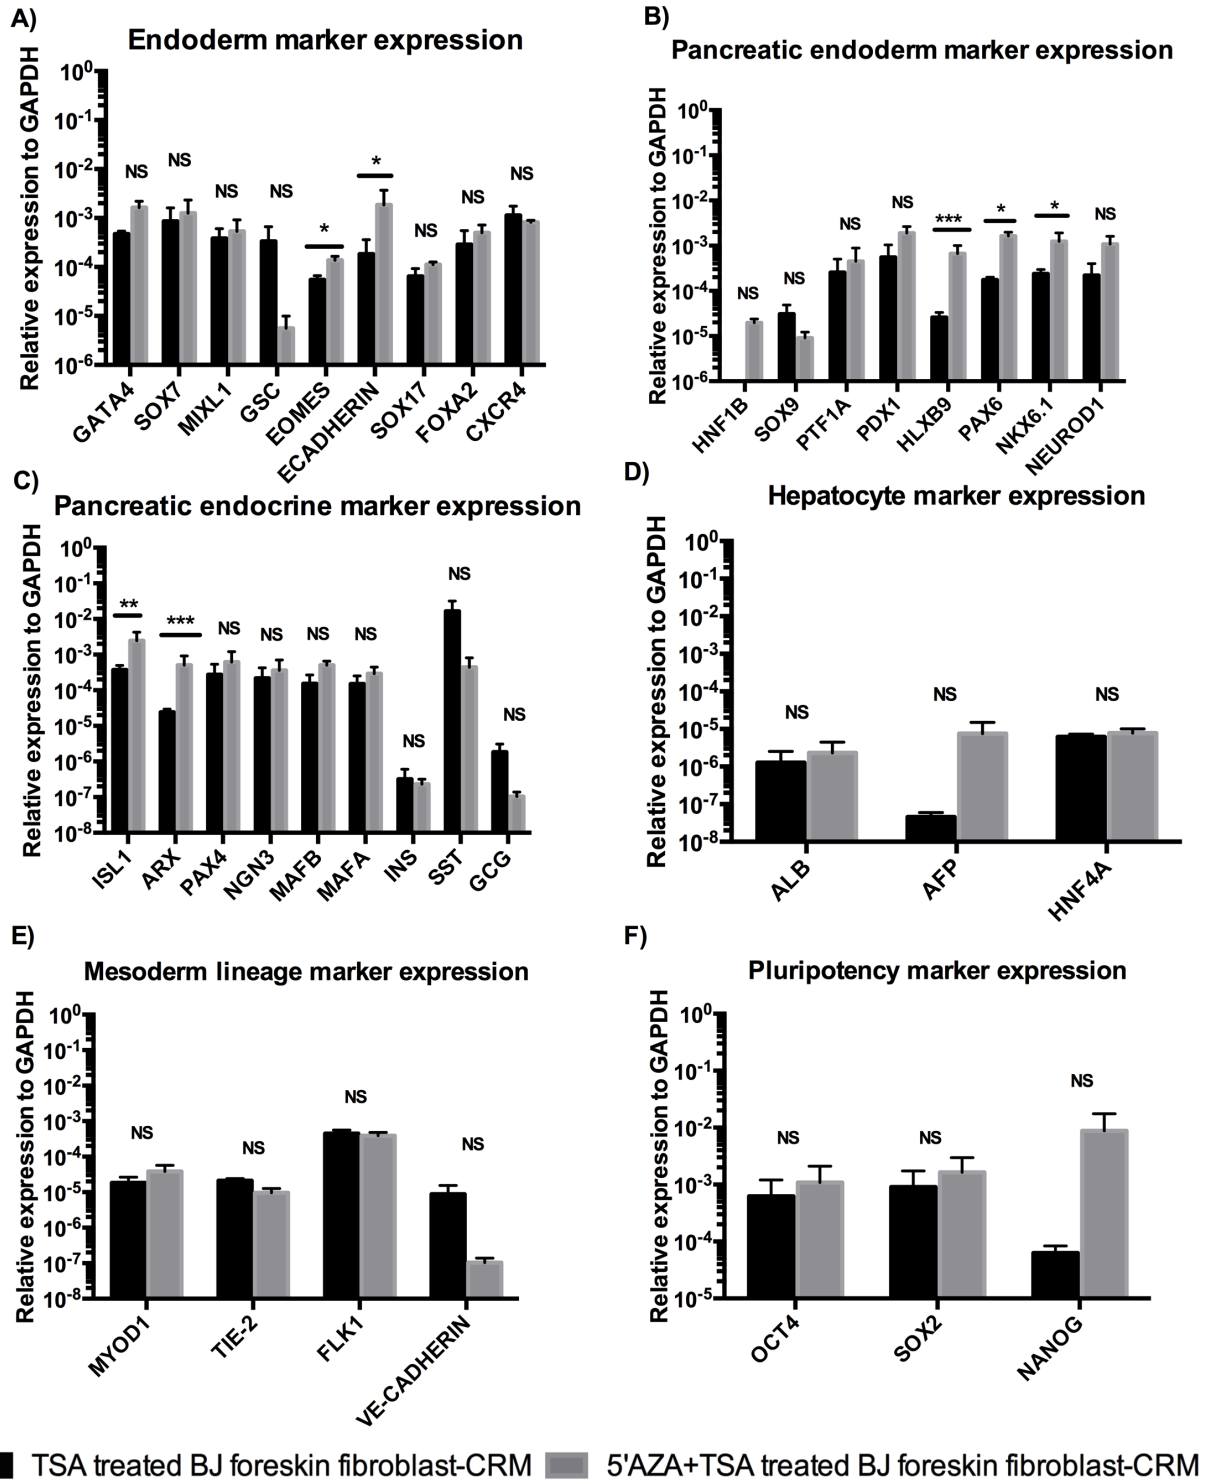

Supplementary figure-5

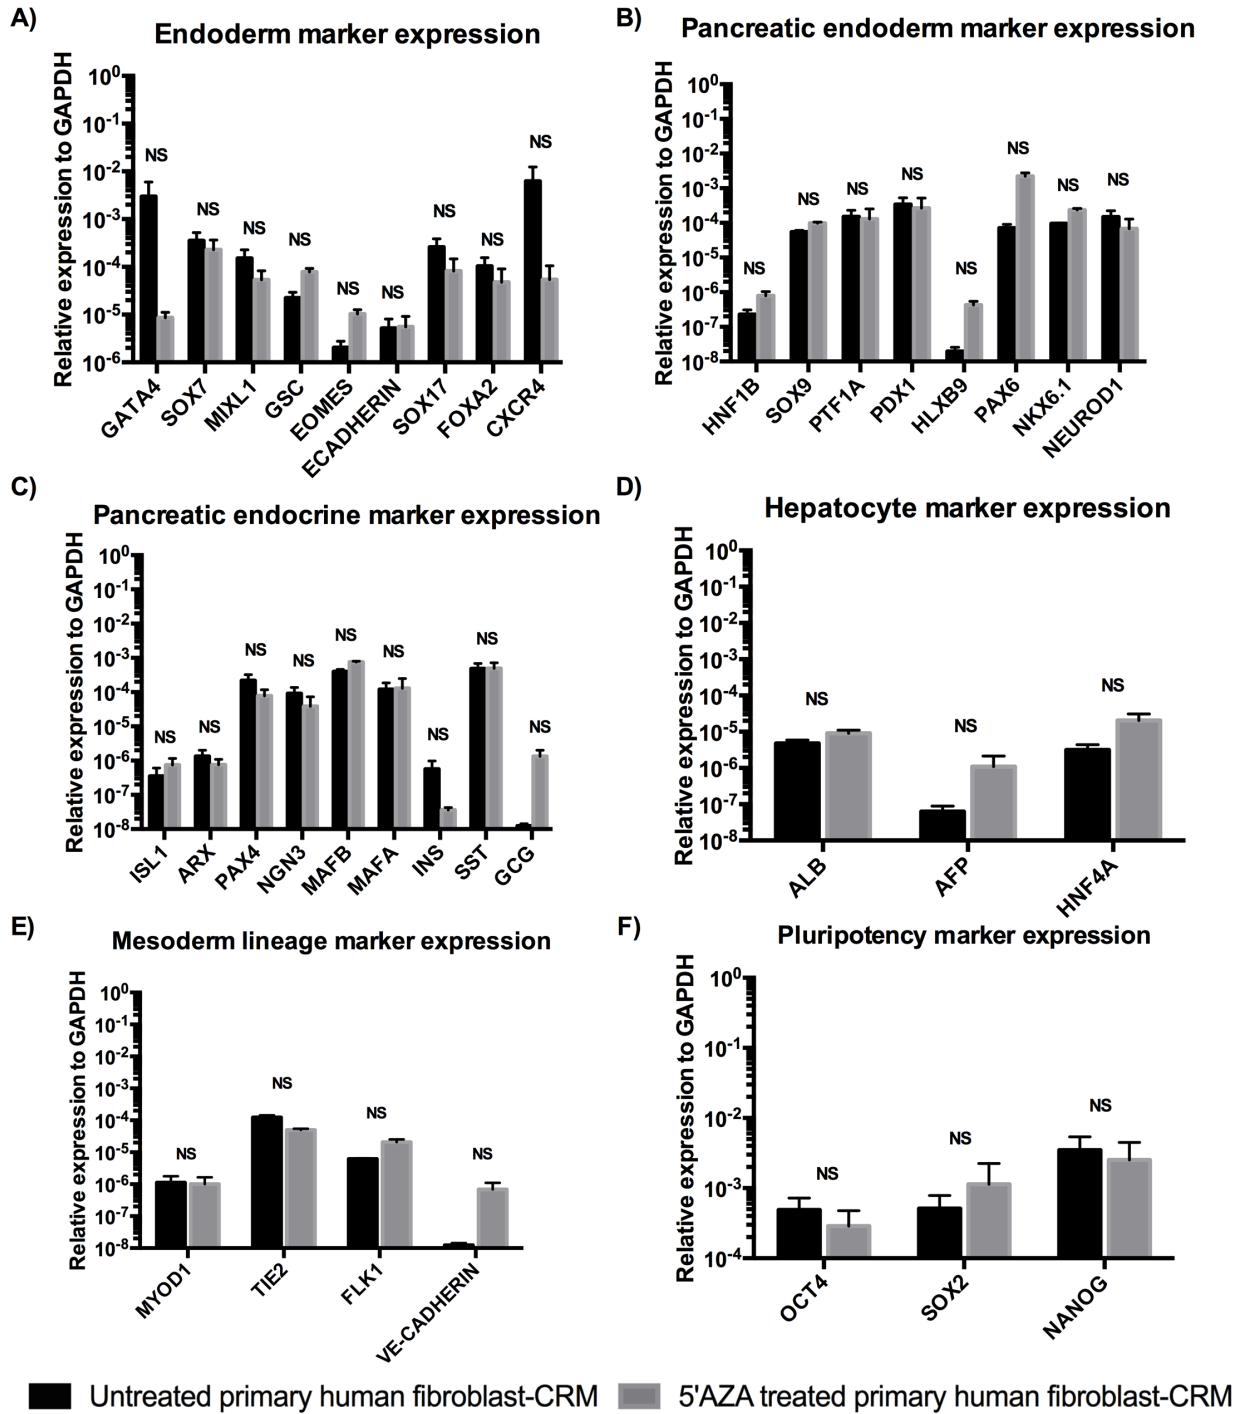

Supplementary figure-6

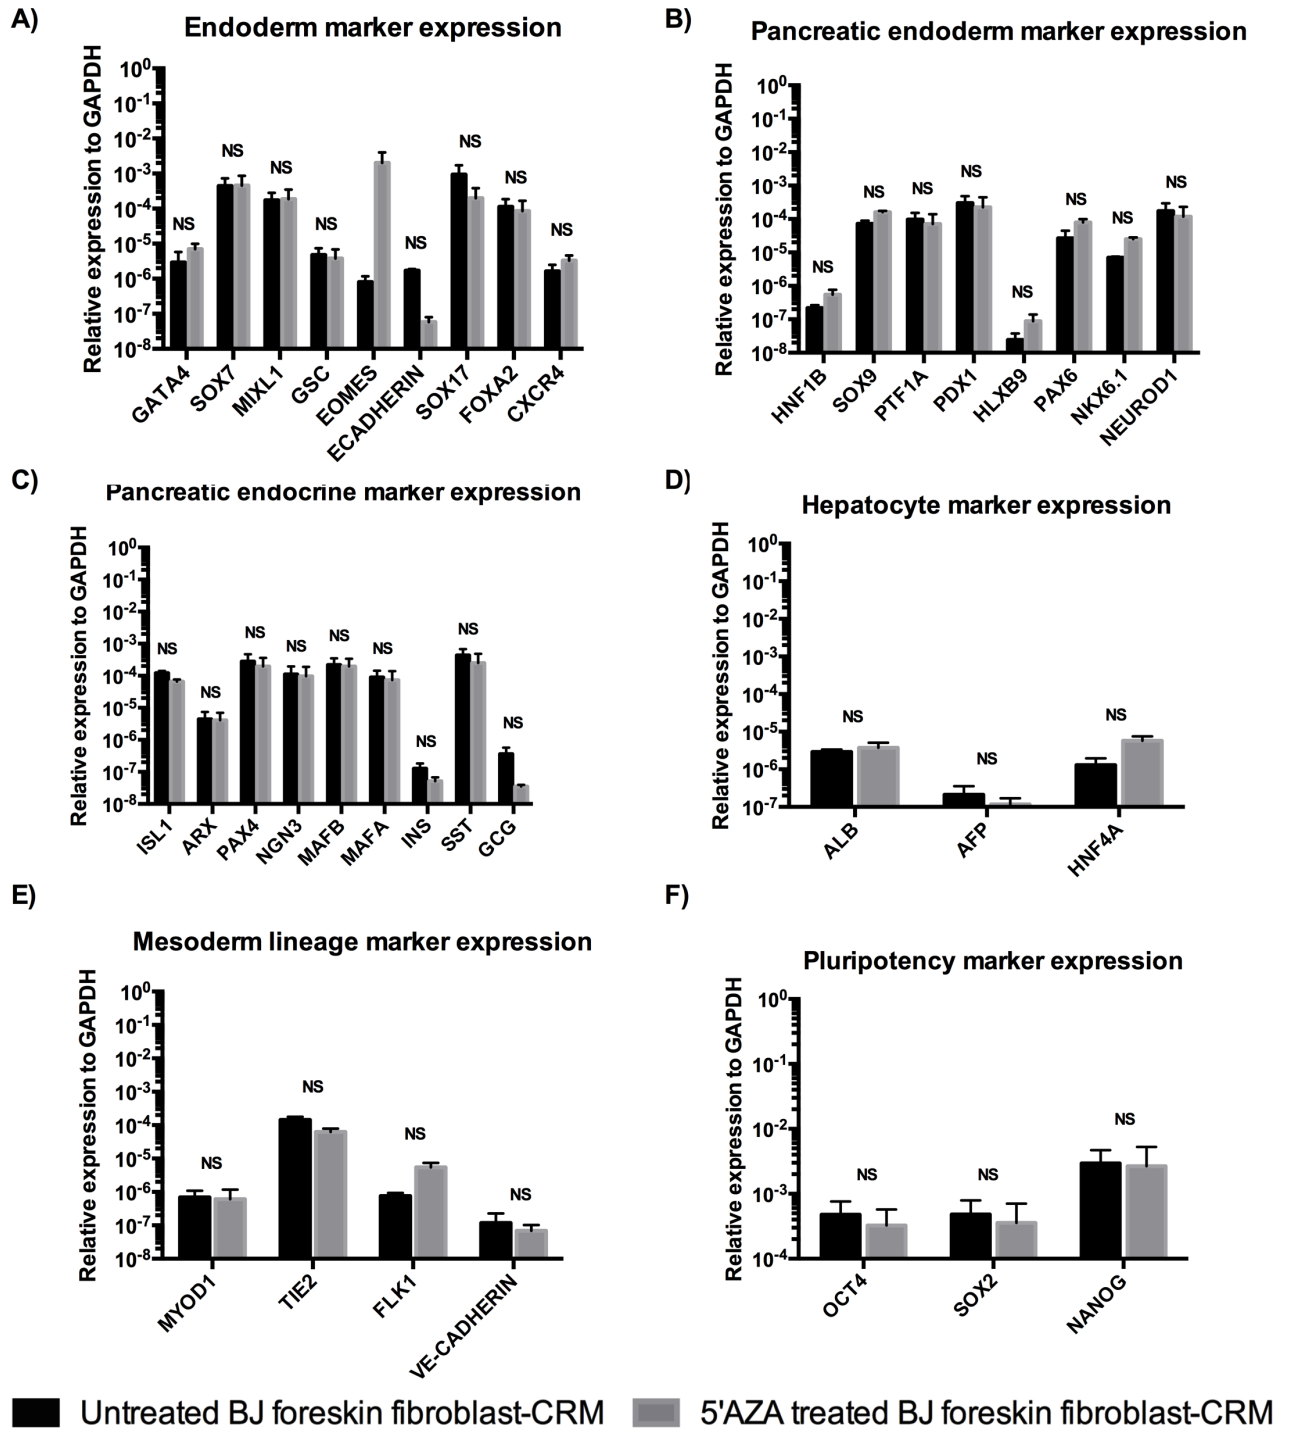

### Supplementary table-1

Primers sets used for gene expression analysis by qRT-PCR

| Gene             | Forward                    | Reverse                     |
|------------------|----------------------------|-----------------------------|
| <i>GAPDH</i>     | TCAAGAAGGTGGTGAAGCAGG      | ACCAGGAAATGAGCTTGACAAA      |
| <i>GATA4</i>     | TCCAAACCAGAAAACGGAAG       | CTGTGCCCCGTAGTGAGATGA       |
| <i>SOX7</i>      | GCCTGTGCAACAAGAGTGAA       | GTACCCTGGGTCTTTGGTCA        |
| <i>MIXL1</i>     | GGATCCAGGTATGGTTCCAG       | CATGAGTCCAGCTTTGAACC        |
| <i>GSC</i>       | TCTCAACCAGCTGCACTGTC       | CCAGACCTCCACTTTCTCCTC       |
| <i>EOMES</i>     | AACAACACCCAGATGATAGTC      | TCATAGTTGTCTCTGAAGCCT       |
| <i>ECADHERIN</i> | CGAACTATATTCTTCTGTGAGAGG   | GATAGATTCTTGGGTTGGGTC       |
| <i>SOX17</i>     | CGCTTTCATGGTGTGGGCTAAGGACG | TAGTTGGGGTGGTCTCTGCATGTGCTG |
| <i>FOXA2</i>     | AGGAGGAAAACGGGAAAGAA       | GGTGCTTGAAGAAGCAGGAG        |
| <i>CXCR4</i>     | CACCGCATCTGGAGAACCA        | GCCCATTTCCTCGGTGTAGTT       |
| <i>HNF1B</i>     | TCACAGATACCAGCAGCATCAGT    | GGGCATCCCAGGCTTGTA          |
| <i>SOX9</i>      | ACGCCATCTTCAAGGCGCTG       | CCGGCTGCACGTCGGTTTT         |
| <i>PTF1A</i>     | ACGACTTCTTCACCGACCAG       | TGGTGGCTAAGGAACTCCAC        |
| <i>PDX1</i>      | TCCACCTTGGGACCTGTTTA       | GTGTGTTAGGGAGCCTTCCA        |
| <i>HLXB9</i>     | ATGATCCTGCCTAAGATGCC       | AAATCTTCACCTGGGTCTCG        |
| <i>PAX6</i>      | CCCAAGAGCAAATTGAGGCCC      | CTCTTCTCCATTTGGCCCTTCGA     |
| <i>NKX6.1</i>    | CTTCCCGTCTTTGTCCAACAA      | CCATCTTCTGGCCCGGAGTGA       |
| <i>NEUROD1</i>   | TAAGACGCAGAAGCTGTCCA       | CTGCTCAGGCAGAAAAGTCC        |
| <i>ISL1</i>      | GTACAACCACCATTTCACTG       | CCCGTACAACCTGATATAATCTC     |
| <i>ARX</i>       | ACAGCGTGTGCCTCTCTGC        | TCGGGCCTCGGTCAAGTCC         |
| <i>PAX4</i>      | CAACCGAGTCCTGCGGGCAT       | GCCAGCTTTCACGGGCCAC         |

## Supplementary table-2

Primers sets used for gene expression analysis by qRT-PCR

| Gene               | Forward primer (5'-3') | Reverse primer (3'-5')   |
|--------------------|------------------------|--------------------------|
| <i>NGN3</i>        | TCTCTATTCTTTTGCGCCGG   | CTTGGACAGTGGGCGCAC       |
| <i>MAFB</i>        | GCCTGCGCTAATTGTAGGAG   | CAAAAGCAGGGAAAGAAACG     |
| <i>MAFA</i>        | TCATCCGGCTCAAGCAGAAG   | TCTCGCTCTCCAGAATGTGC     |
| <i>INS</i>         | ATCAAGCACATCACTGTCCT   | TGTAGAAGAAGCCTCGTTCC     |
| <i>SST</i>         | GAGGCTTGAGCTGCAGAGAT   | TCGCTGAAGACTTGGAGGAT     |
| <i>GCG</i>         | GTTCCCTTCAAGACACAGAG   | GGCAATGTTATTCCTGTTCC     |
| <i>MYOD1</i>       | CGACGGCATGATGGACTACA   | TAGTAGGCGCCTTCGTAGCA     |
| <i>TIE2</i>        | TGCCCAGATATTGGTGTCT    | CTCATAAAGCGTGGTATTCACGTA |
| <i>FLK1</i>        | ACAACCAGACGGACAGTGGT   | AGCCTTCAGATGCCACAGAC     |
| <i>VE-CADHERIN</i> | G TTCACGCATCGGTTGTTC   | TCTGCATCCACTGCTGTCA      |
| <i>ALB</i>         | ATGCTGAGGCAAAGGATGTC   | AGCAGCAGCACGACAGAGTA     |
| <i>AFP</i>         | TGAGCACTGTTGCAGAGGAG   | GTGGTCAGTTTGCAGCATTC     |
| <i>HNF4A</i>       | ACTACGGTGCCTCGAGCTGT   | GGCACTGGTTCCTCTTGTCT     |
| <i>OCT4</i>        | GATGGCGTACTGTGGGCCC    | TGGGACTCCTCCGGGTTTTG     |
| <i>SOX2</i>        | TGGCGAACCATCTCTGTGGT   | CCAACGGTGTCAACCTGCAT     |
| <i>NANOG</i>       | CCTGTGATTTGTGGGCCTG    | GACAGTCTCCGTGTGAGGCAT    |
